# Supplementary material for: The efficient urban canopy dependency parametrization (SURY) v1.0 foratmospheric modelling: description and application with the COSMO-CLM modelfor a Belgian summer
Source: Copernicus journal article supplement (doi:10.5194/gmd-9-3027-2016), 2016-09-02
Supplement: Supplementary file [file gmd-9-3027-2016-supplement-title-page.pdf › gmd-9-3027-2016-supplement-title-page.pdf]

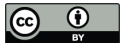

## *Supplement of*

# **The efficient urban canopy dependency parametrization (SURY) v1.0 for atmospheric modelling: description and application with the COSMO-CLM model for a Belgian summer**

**Hendrik Wouters et al.**

*Correspondence to:* Hendrik Wouters ([hendrik.wouters@kuleuven.be](mailto:hendrik.wouters@kuleuven.be))

- [gmd-9-3027-2016-supplement-title-page.pdf](#)
- [sury](#)
  - [README.md](#)
  - [gpl.txt](#)
  - [sury.py](#)

The copyright of individual parts of the supplement might differ from the CC-BY 3.0 licence.
